# Supplementary material
Source: publisher figshare collection journal article supplement (https://tandf.figshare.com/articles/dataset/_/5492533)
Supplement: Supplementary file 1 [file 2]

# Report

Processing Report

11 July 2017

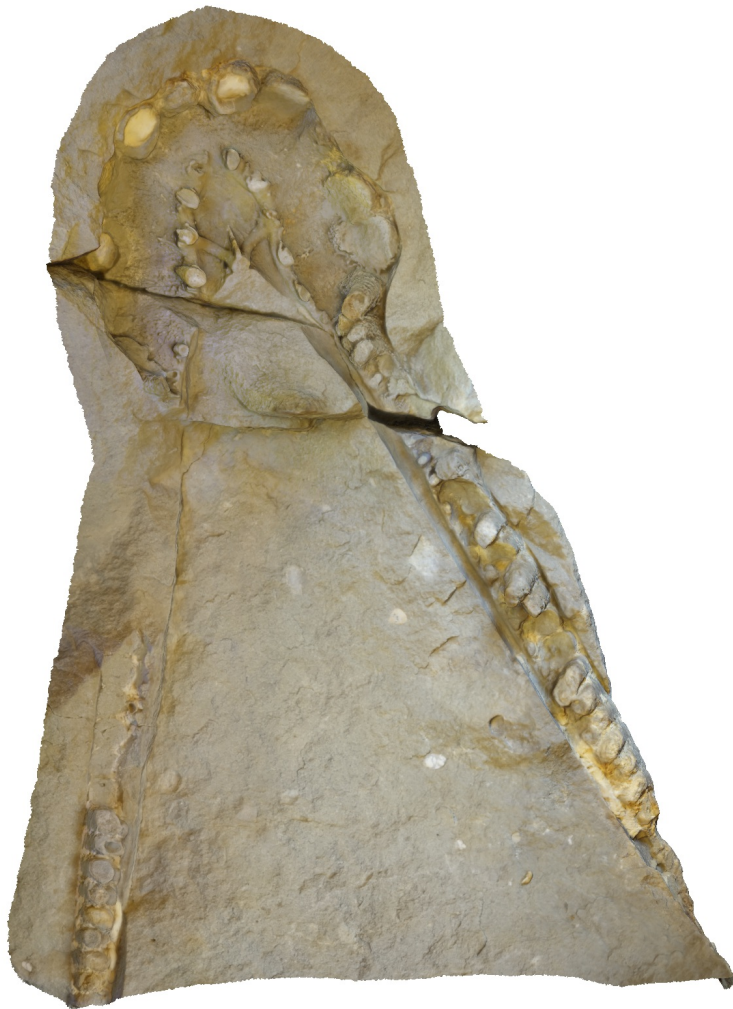

# Survey Data

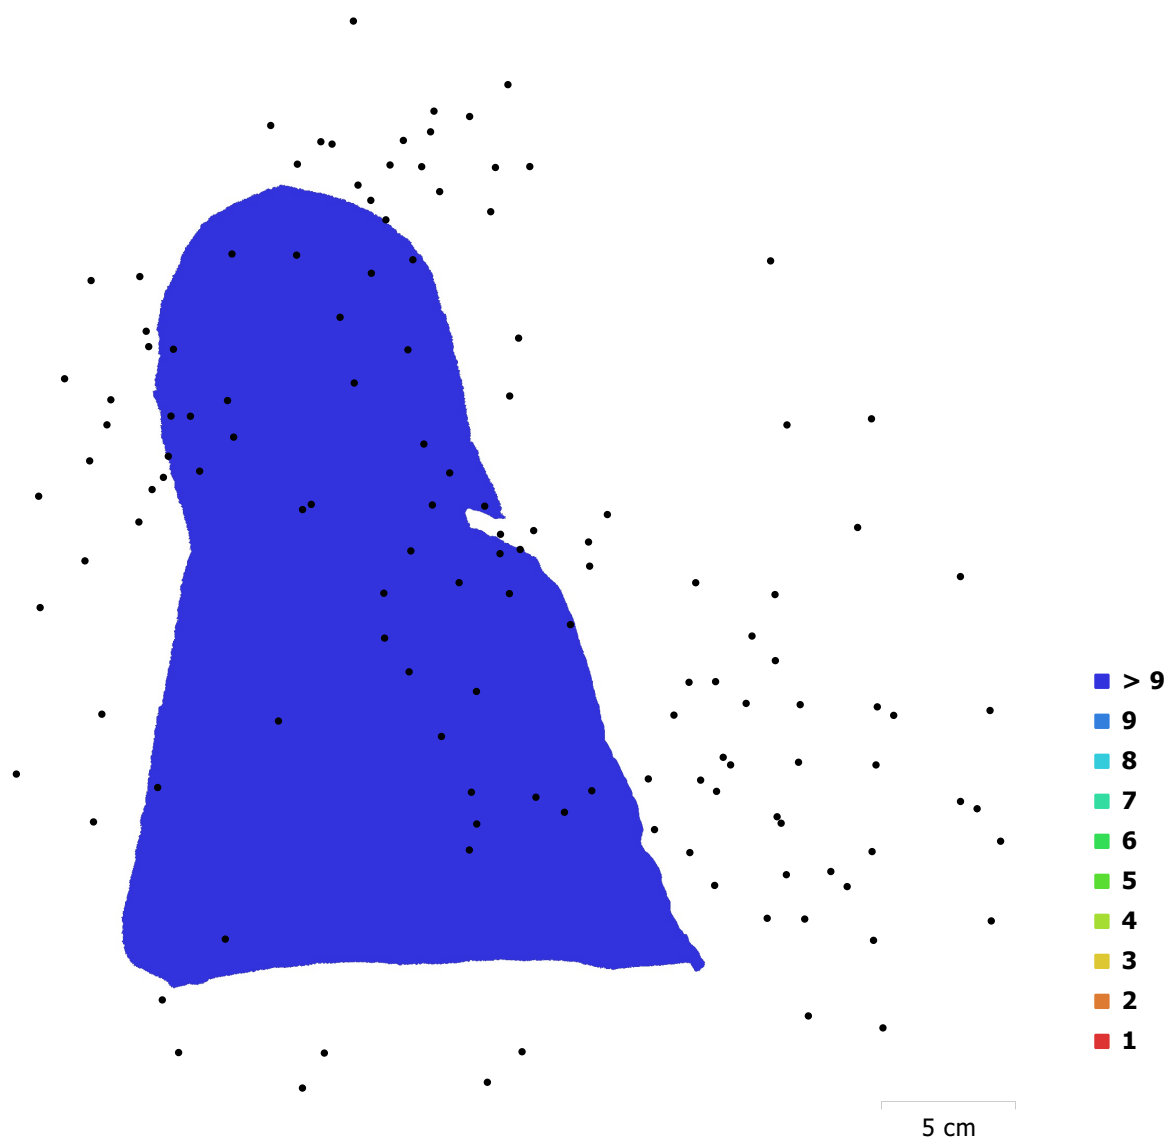

Fig. 1. Camera locations and image overlap.

|                    |                     |                     |          |
|--------------------|---------------------|---------------------|----------|
| Number of images:  | 133                 | Camera stations:    | 131      |
| Flying altitude:   | 17 cm               | Tie points:         | 233,518  |
| Ground resolution: | 0.0406 mm/pix       | Projections:        | 953,049  |
| Coverage area:     | 410 cm <sup>2</sup> | Reprojection error: | 1.15 pix |

| Camera Model          | Resolution  | Focal Length | Pixel Size     | Precalibrated |
|-----------------------|-------------|--------------|----------------|---------------|
| DSC-RX100M2 (10.4 mm) | 5472 x 3648 | 10.4 mm      | 2.44 x 2.44 μm | No            |

Table 1. Cameras.

# Camera Calibration

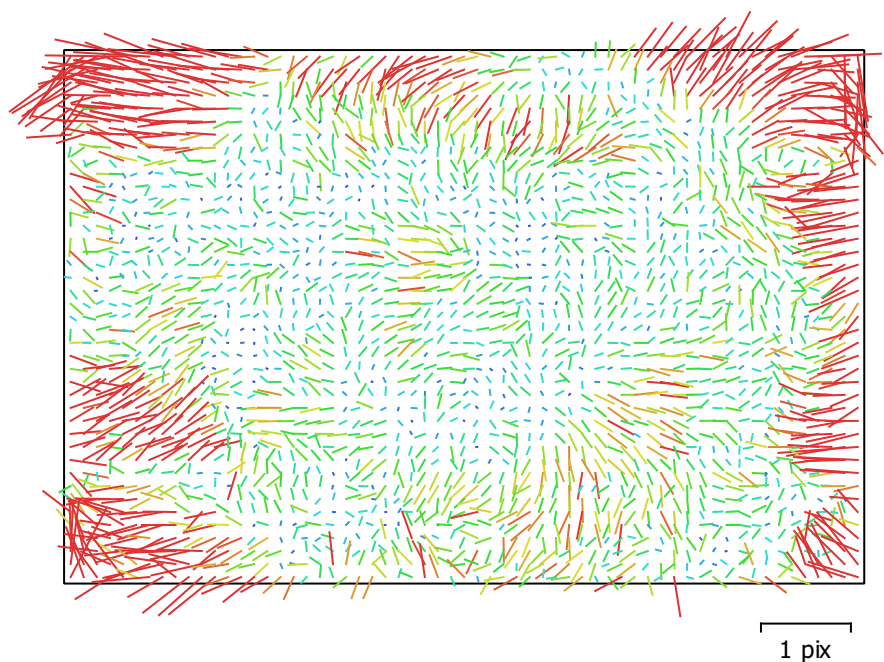

Fig. 2. Image residuals for DSC-RX100M2 (10.4 mm).

## DSC-RX100M2 (10.4 mm)

133 images

| Type  | Resolution  | Focal Length | Pixel Size     |
|-------|-------------|--------------|----------------|
| Frame | 5472 x 3648 | 10.4 mm      | 2.44 x 2.44 μm |
| F:    | 4200.28     |              |                |
| Cx:   | -7.71413    | B1:          | 0              |
| Cy:   | 13.5903     | B2:          | 0              |
| K1:   | 0.0100951   | P1:          | 0              |
| K2:   | 0.0259673   | P2:          | 0              |
| K3:   | -0.046952   | P3:          | 0              |
| K4:   | 0           | P4:          | 0              |

# Scale Bars

| Label | Distance (m) | Error (m)          |
|-------|--------------|--------------------|
| 42_32 | 0.19         | 1.48492e-14        |
| Total |              | <b>1.48492e-14</b> |

Table 2. Control scale bars.

# Digital Elevation Model

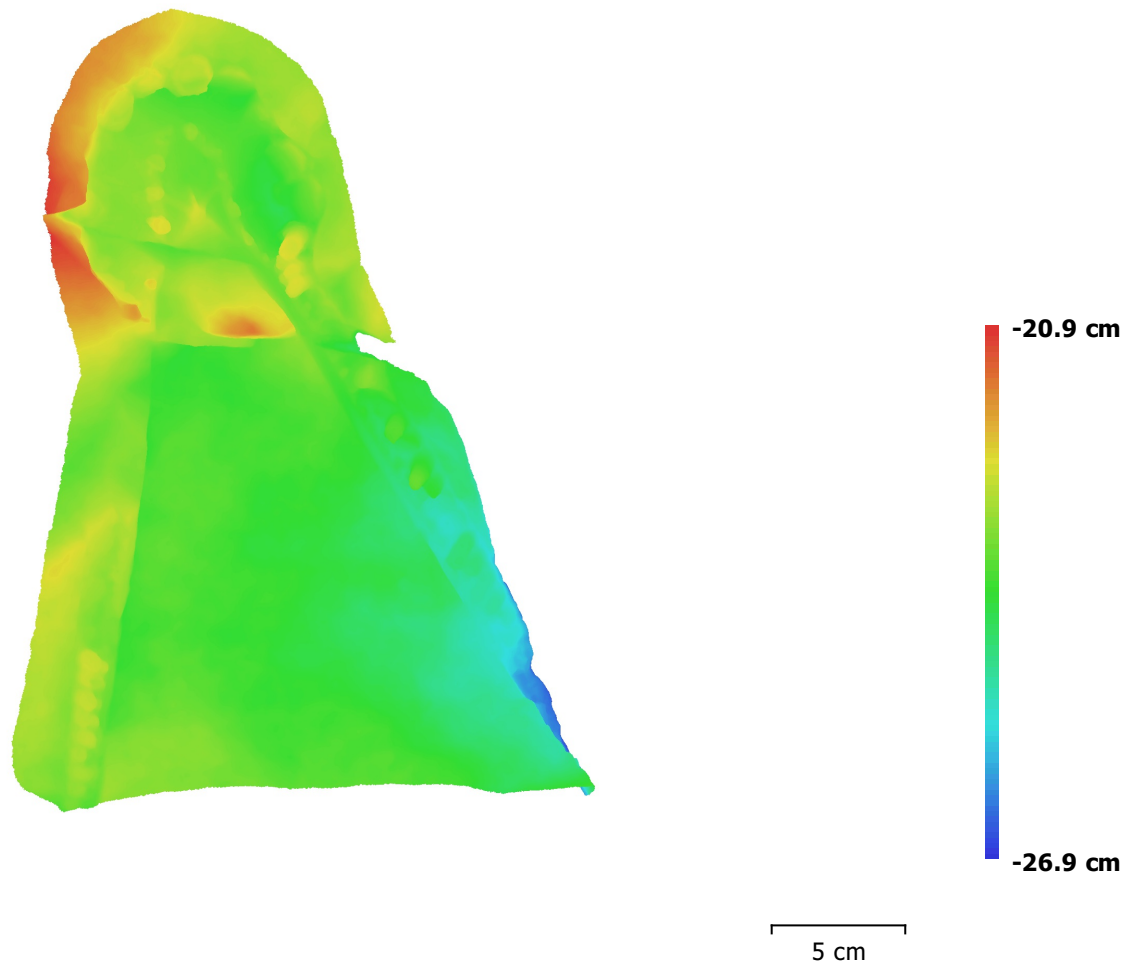

Fig. 3. Reconstructed digital elevation model.

Resolution: unknown

Point density: unknown

# Processing Parameters

## General

|                   |                       |
|-------------------|-----------------------|
| Cameras           | 133                   |
| Aligned cameras   | 131                   |
| Markers           | 2                     |
| Scale bars        | 1                     |
| Coordinate system | Local Coordinates (m) |
| Rotation angles   | Yaw, Pitch, Roll      |

## Point Cloud

|                    |                       |
|--------------------|-----------------------|
| Points             | 233,518 of 349,360    |
| Reprojection error | 1.15286 (3.49424 max) |
| Effective overlap  | 4.16461               |

## Alignment parameters

|                            |                      |
|----------------------------|----------------------|
| Accuracy                   | High                 |
| Generic preselection       | No                   |
| Reference preselection     | No                   |
| Key point limit            | 400,000              |
| Tie point limit            | 10,000               |
| Constrain features by mask | No                   |
| Matching time              | 2 hours 46 minutes   |
| Alignment time             | 1 minutes 51 seconds |

## Model

|          |                      |
|----------|----------------------|
| Faces    | 299,999              |
| Vertices | 151,810              |
| Texture  | 3,000 x 3,000, uint8 |

## Reconstruction parameters

|                 |                       |
|-----------------|-----------------------|
| Surface type    | Arbitrary             |
| Source data     | Dense                 |
| Interpolation   | Enabled               |
| Quality         | High                  |
| Depth filtering | Aggressive            |
| Face count      | 0                     |
| Processing time | 19 minutes 53 seconds |

## Texturing parameters

|                 |                       |
|-----------------|-----------------------|
| Mapping mode    | Generic               |
| Blending mode   | Average               |
| Texture size    | 3,000 x 3,000         |
| UV mapping time | 10 seconds            |
| Blending time   | 14 minutes 45 seconds |

## Software

|          |                  |
|----------|------------------|
| Version  | 1.3.1 build 4030 |
| Platform | Windows 64       |
